# Supplementary material for: Optimal mean airway pressure during high-frequency oscillatory ventilation in an experimental model of acute respiratory distress syndrome: EIT-based method
Source: Ann Intensive Care. 2020 Mar 6;10:31. doi: 10.1186/s13613-020-0647-z (PMC7060304; doi:10.1186/s13613-020-0647-z)
Supplement: Supplementary file 1 — Additional file 1: Figure S1. Flowchart of the study. Figure S2. PaO2/FiO2 (left) and PaCO2 (right) during mPaw decrements trial after having fully recruited the lungs. [file 13613_2020_647_MOESM1_ESM.pdf]

**Optimal mean airway pressure during high frequency oscillatory ventilation in an experimental model of acute respiratory distress syndrome: EIT-based method**

Songqiao Liu, MD, PhD <sup>1</sup>, Zhanqi Zhao, PhD <sup>2,3</sup>, Li Tan, MD, <sup>1,4</sup>, Lihui Wang, MD <sup>1</sup>,  
Knut Möller, MD, PhD <sup>2</sup>, Inez Frerichs, MD, PhD <sup>5</sup>, Tao Yu, MD, PhD <sup>1</sup>, Yingzi Huang,  
MD, PhD <sup>1</sup>, Chun Pan MD, PhD<sup>1</sup>, Yi Yang, MD, PhD <sup>1</sup>, and Haibo Qiu, MD, PhD

<sup>1§</sup>

Additional File 1

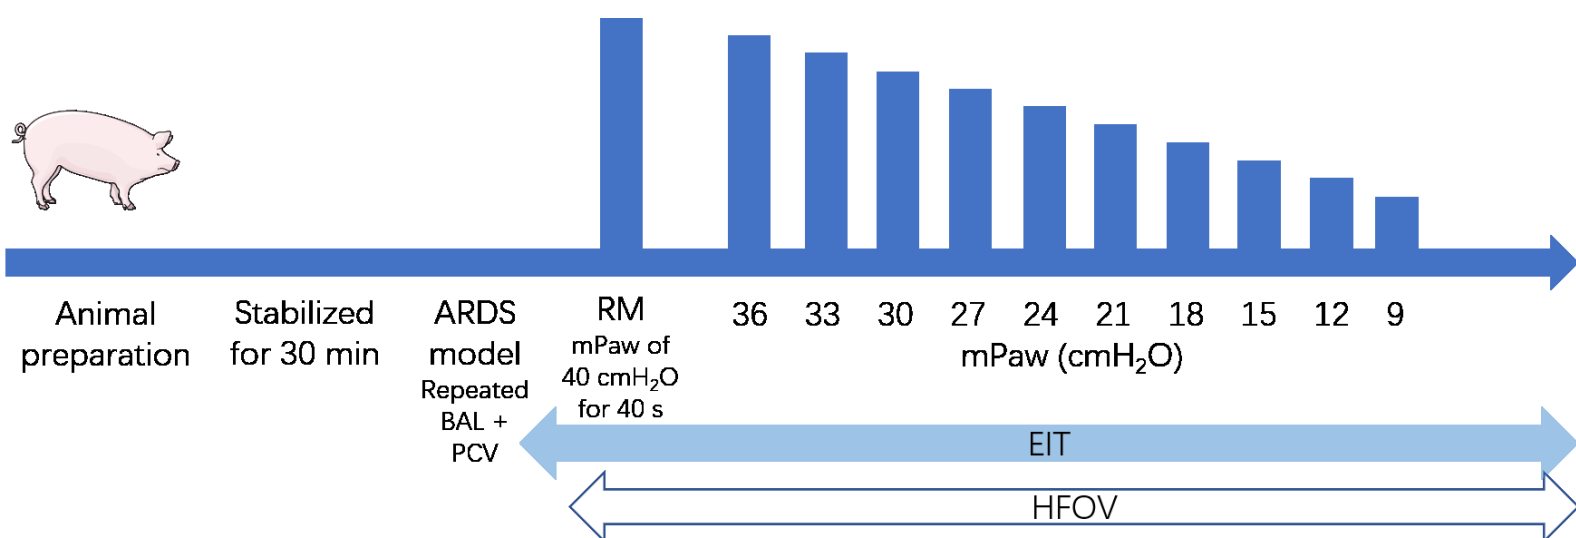

Additional file 1: Figure S1. Flowchart of the study.

ARDS, acute respiratory distress syndrome; EIT, electrical impedance tomography; HFOV, high-frequency oscillatory ventilation; mPaw, mean airway pressure; PCV, pressure control ventilation.

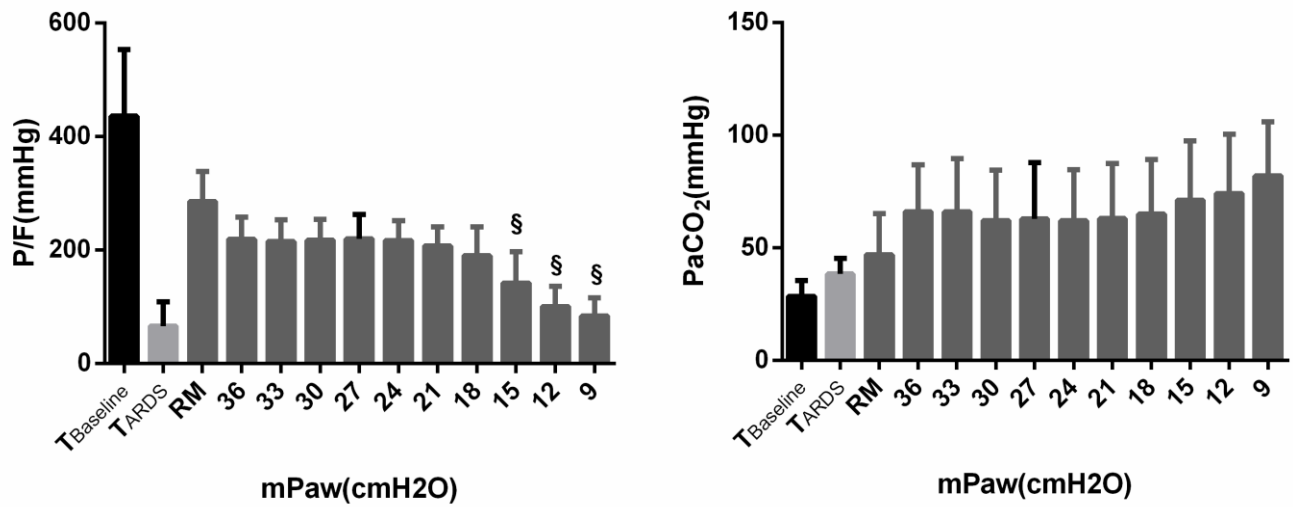

Additional file 1: Figure S2. PaO<sub>2</sub>/FiO<sub>2</sub> (left) and PaCO<sub>2</sub> (right) during mPaw decrements trial after having fully recruited the lungs.

Mean values and standard deviations are shown.

§, PaO<sub>2</sub>/FiO<sub>2</sub> decrease >10% compared with mPaw 18 cmH<sub>2</sub>O, indicates the mPaw level at which the predefined optimal oxygenation criteria were reached during mPaw decrements trial after having fully recruited the lungs.
